# Supplementary material for: Density-dependent flow generation in active cytoskeletal fluids
Source: PubMed Central journal article supplement — Sci Rep. 2024 Dec 28;14:31339. doi: 10.1038/s41598-024-82864-z (PMC11682274; doi:10.1038/s41598-024-82864-z), 2024-12-28
Supplement: 41598_2024_82864_MOESM1_ESM.pdf [file 41598_2024_82864_MOESM1_ESM.pdf]

# Supplemental Material for Density-dependent flow generation in active cytoskeletal fluids

Tomoka Kashiwabara,<sup>1</sup> Tatsuya Fukuyama,<sup>1</sup> and Yusuke T. Maeda<sup>1,\*</sup>

<sup>1</sup>Department of Chemical Engineering, Kyoto University, Nishikyo-ku, Kyoto 615-8510, Japan

(Dated: October 28, 2024)

## SUPPLEMENTAL FIGURE

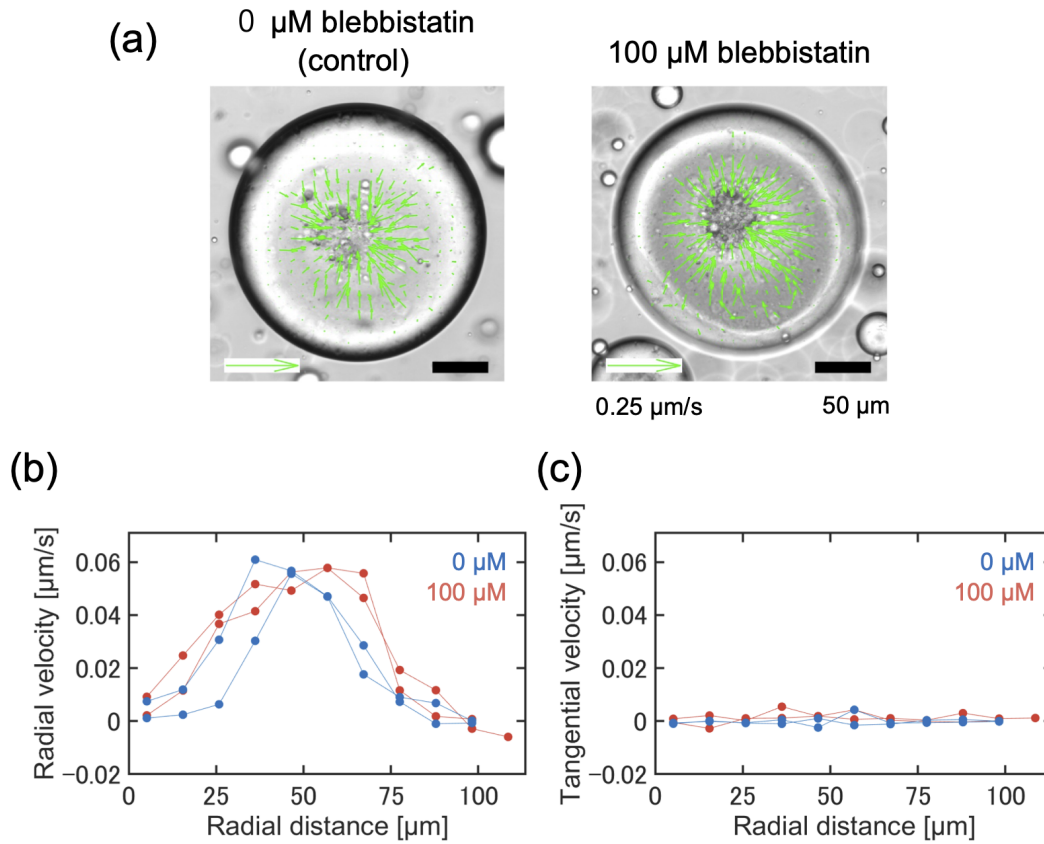

FIG. S1. **Blebbistatin-treated confined actomyosin solution within a droplet.** (a) Microscopic time-lapse observation of confined actomyosin solution in a droplet. Left: 0  $\mu\text{mol/L}$  blebbistatin (control), right: 100  $\mu\text{mol/L}$  blebbistatin. The number in the upper right corner of each image is the elapsed time. Scale bar: 50  $\mu\text{m}$ . The figure on the right depicts the flow field of the transport of granular particles obtained using particle image velocimetry (PIV) analysis. Scale arrow is  $0.25 \mu\text{m s}^{-1}$ . (b) Radial velocity profile of actin flow, with radial distances measured every 11.8  $\mu\text{m}$ , which corresponds to the grid size used in the PIV analysis. Blue: 0  $\mu\text{mol/L}$  blebbistatin (control), red: 100  $\mu\text{mol/L}$  blebbistatin. Two representative experimental data, control and blebbistatin treated, respectively, are plotted. (c) Tangential velocity profile of actin flow. .

\* maeda@cheme.kyoto-u.ac.jp

**SUPPLEMENTARY MOVIES**

**Movie 1.** Actin flow generation in the artificial cell containing the actomyosin cytoskeleton ( $\phi=100\%$ ). Time-lapse image was acquired at every 10 second. Scale bar: 50  $\mu\text{m}$ .

**Movie 2.** Density-dependence of actin flow generation in artificial cells containing diluted actomyosin cytoskeleton ( $\phi = 0\%, 40\%, 60\%, 80\%$ ). Time-lapse image was acquired at every 10 second. Scale bars: 50  $\mu\text{m}$ .

**Movie 3.** Density-dependence of actin flow generation in bulk solutions containing diluted actomyosin cytoskeleton ( $\phi = 0\%, 40\%, 60\%, 80\%$ ). Time-lapse image was acquired at every 1 second. Scale bars: 50  $\mu\text{m}$ .
